# Supplementary material for: How much does the Dallas Pain Questionnaire score have to improve to indicate that patients with chronic low back pain feel better or well?
Source: Springer Nature journal article supplement (doi:10.1007/s00586-015-3957-3), 2015-04-22
Supplement: MOESM2 [file 586_2015_3957_MOESM2_ESM.pdf]

## ERRATUM

In the article : « Validation of the French version of the Dallas pain questionnaire in chronic low back pain patients » by Marc Marty, Francis Blotman, Bernard Avouac, Sylvie Rozenberg, Jean-Pierre Valat, published in Rev Rhum [Engl Ed] 1998; 65(2), pp. 126-134 : please read figure 1 pp. 129-130 as follows :

|                                                                                                                                                                                                                                                                                                                                                                                                                                                                                 |          |                                                              |        |
|---------------------------------------------------------------------------------------------------------------------------------------------------------------------------------------------------------------------------------------------------------------------------------------------------------------------------------------------------------------------------------------------------------------------------------------------------------------------------------|----------|--------------------------------------------------------------|--------|
| <b>DOULEUR DU RACHIS : AUTO-QUESTIONNAIRE DE DALLAS (D.R.A.D.)</b><br><i>version française validée par la Section Rachis de la S.F.R.</i>                                                                                                                                                                                                                                                                                                                                       |          |                                                              |        |
| NOM :                                                                                                                                                                                                                                                                                                                                                                                                                                                                           | PRÉNOM : | SEXE : F <input type="checkbox"/> M <input type="checkbox"/> | DATE : |
| <p><b>A lire attentivement :</b> ce questionnaire a été conçu pour permettre à votre médecin de savoir dans quelle mesure votre vie est perturbée par votre douleur. Veuillez répondre personnellement à toutes les questions en cochant vous-même les réponses.<br/>Pour chaque question, cochez en mettant une croix (X) à l'endroit qui correspond le mieux à votre état sur la ligne continue (de 0 % à 100 %, chaque extrémité correspondant à une situation extrême).</p> |          |                                                              |        |

**1. La douleur et son intensité :**

Dans quelle mesure avez-vous besoin de traitements contre la douleur pour vous sentir bien ?

|             |                               |               |
|-------------|-------------------------------|---------------|
| pas du tout | parfois                       | tout le temps |
| 0 %         | ----- ----- ----- ----- ----- | 100 %         |

**2. Les gestes de la vie quotidienne :**

Dans quelle mesure votre douleur perturbe-t-elle les gestes de votre vie quotidienne (sortie du lit, se brosser les dents, s'habiller, etc.) ?

|                              |                               |                              |
|------------------------------|-------------------------------|------------------------------|
| pas du tout (pas de douleur) | moyennement                   | je ne peux pas sortir du lit |
| 0 %                          | ----- ----- ----- ----- ----- | 100 %                        |

**3. La possibilité de soulever quelque chose :**

Dans quelle mesure êtes-vous limité(e) pour soulever quelque chose ?

|                           |                               |                          |
|---------------------------|-------------------------------|--------------------------|
| pas du tout (comme avant) | moyennement                   | je ne peux rien soulever |
| 0 %                       | ----- ----- ----- ----- ----- | 100 %                    |

**4. La marche :**

Dans quelle mesure votre douleur limite-t-elle maintenant votre distance de marche par rapport à celle que vous pouviez parcourir avant votre problème de dos ?

|                       |                               |              |              |
|-----------------------|-------------------------------|--------------|--------------|
| je marche comme avant | presque comme avant           | presque plus | plus du tout |
| 0 %                   | ----- ----- ----- ----- ----- |              | 100 %        |

**5. La position assise :**

Dans quelle mesure votre douleur vous gêne-t-elle pour rester assis(e) ?

|                                                  |                               |                                |
|--------------------------------------------------|-------------------------------|--------------------------------|
| pas du tout<br>(pas d'aggravation de la douleur) | moyennement                   | je ne peux pas rester assis(e) |
| 0 %                                              | ----- ----- ----- ----- ----- | 100 %                          |

**6. La position debout :**

Dans quelle mesure votre douleur vous gêne-t-elle pour rester debout de façon prolongée ?

|                                              |             |                              |
|----------------------------------------------|-------------|------------------------------|
| pas du tout<br>(je reste debout comme avant) | moyennement | je ne peux pas rester debout |
| 0 %                                          | _____       |                              |
|                                              |             | 100 %                        |

**7. Le sommeil :**

Dans quelle mesure votre douleur gêne-t-elle votre sommeil ?

|                                      |             |                               |
|--------------------------------------|-------------|-------------------------------|
| pas du tout<br>(je dors comme avant) | moyennement | je ne peux pas dormir du tout |
| 0 %                                  | _____       |                               |
|                                      |             | 100 %                         |

**Total x 3 = \_\_\_\_\_ % de répercussion sur les activités quotidiennes**

**8. Activité sociale :**

Dans quelle mesure votre douleur perturbe-t-elle votre vie sociale (danser, jeux et divertissements, repas ou soirées entre amis, sorties, etc.) ?

|                                                 |             |                                      |
|-------------------------------------------------|-------------|--------------------------------------|
| pas du tout<br>(ma vie sociale est comme avant) | moyennement | je n'ai plus aucune activité sociale |
| 0 %                                             | _____       |                                      |
|                                                 |             | 100 %                                |

**9. Les déplacements en voiture :**

Dans quelle mesure votre douleur gêne-t-elle vos déplacements en voiture ?

|                                            |             |                                       |
|--------------------------------------------|-------------|---------------------------------------|
| pas du tout<br>(je me déplace comme avant) | moyennement | je ne peux pas me déplacer en voiture |
| 0 %                                        | _____       |                                       |
|                                            |             | 100 %                                 |

**10. Les activités professionnelles :**

Dans quelle mesure votre douleur perturbe-t-elle votre travail ?

|                                      |             |                           |
|--------------------------------------|-------------|---------------------------|
| pas du tout<br>(elle ne me gêne pas) | moyennement | je ne peux pas travailler |
| 0 %                                  | _____       |                           |
|                                      |             | 100 %                     |

**Total x 5 = \_\_\_\_\_ % de répercussion sur le rapport activités professionnelles/loisirs**

**11. L'anxiété/Le moral :**

Dans quelle mesure estimez-vous que vous parvenez à faire face à ce que l'on exige de vous ?

|                                                 |             |                     |
|-------------------------------------------------|-------------|---------------------|
| je fais entièrement face<br>(pas de changement) | moyennement | je ne fais pas face |
| 0 %                                             | _____       |                     |
|                                                 |             | 100 %               |

**12. La maîtrise de soi :**

Dans quelle mesure estimez-vous que vous arrivez à contrôler vos réactions émotionnelles ?

|                                                    |             |                                |
|----------------------------------------------------|-------------|--------------------------------|
| je les contrôle entièrement<br>(pas de changement) | moyennement | je ne les contrôle pas du tout |
| 0 %                                                | _____       |                                |
|                                                    |             | 100 %                          |

**13. La dépression :**

Dans quelle mesure vous sentez-vous déprimé(e) depuis que vous avez mal ?

|                           |       |                                 |
|---------------------------|-------|---------------------------------|
| je ne suis pas déprimé(e) |       | je suis complètement déprimé(e) |
| 0 %                       | _____ |                                 |
|                           |       | 100 %                           |

**Total x 5 = \_\_\_\_\_ % de répercussion sur le rapport anxiété/dépression**

**14. Les relations avec les autres :**

Dans quelle mesure pensez-vous que votre douleur a changé vos relations avec les autres ?

|                   |       |                    |
|-------------------|-------|--------------------|
| pas de changement |       | changement radical |
| 0 %               | _____ |                    |
|                   |       | 100 %              |

**15. Le soutien dans la vie de tous les jours :**

Dans quelle mesure avez-vous besoin du soutien des autres depuis que vous avez mal (travaux domestiques, préparation des repas, etc.) ?

|                          |       |                   |
|--------------------------|-------|-------------------|
| aucun soutien nécessaire |       | soutien permanent |
| 0 %                      | _____ |                   |
|                          |       | 100 %             |

**16. Les réactions défavorables des proches :**

Dans quelle mesure estimez-vous que votre douleur provoque, chez vos proches, de l'irritation, de l'agacement, de la colère à votre égard ?

|             |         |               |
|-------------|---------|---------------|
| pas du tout | parfois | tout le temps |
| 0 %         | _____   |               |
|             |         | 100 %         |

**Total x 5 = \_\_\_\_\_ % de répercussion sur la sociabilité**

**Fig. 1. - French version of Dallas Pain Questionnaire.**
